# Supplementary material for: In Vitro Study of Biocontrol Potential of Rhizospheric Pseudomonas aeruginosa against Pathogenic Fungi of Saffron (Crocus sativus L.)
Source: MDPI journal article supplement (doi:10.3390/pathogens10111423), 2021-11-02
Supplement: s1 [file s1]

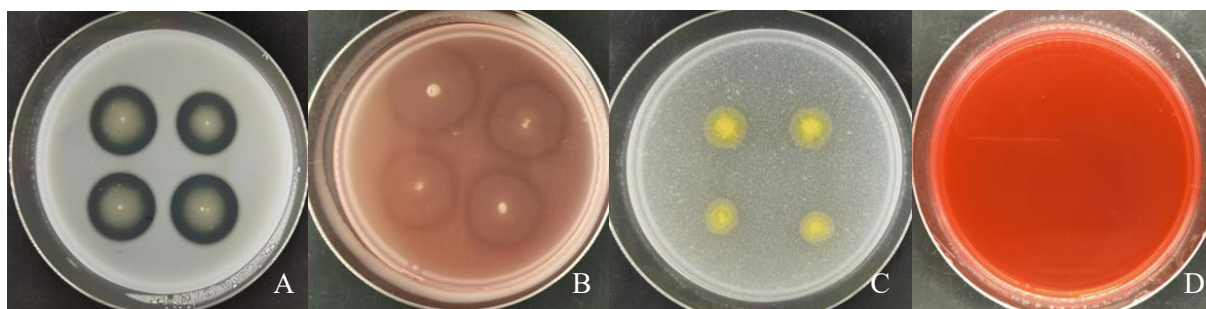

**Figure S1. hydrolytic enzymes activities**

(A: protease +, B: glucanase +, C: chitinase –, D: cellulose –)

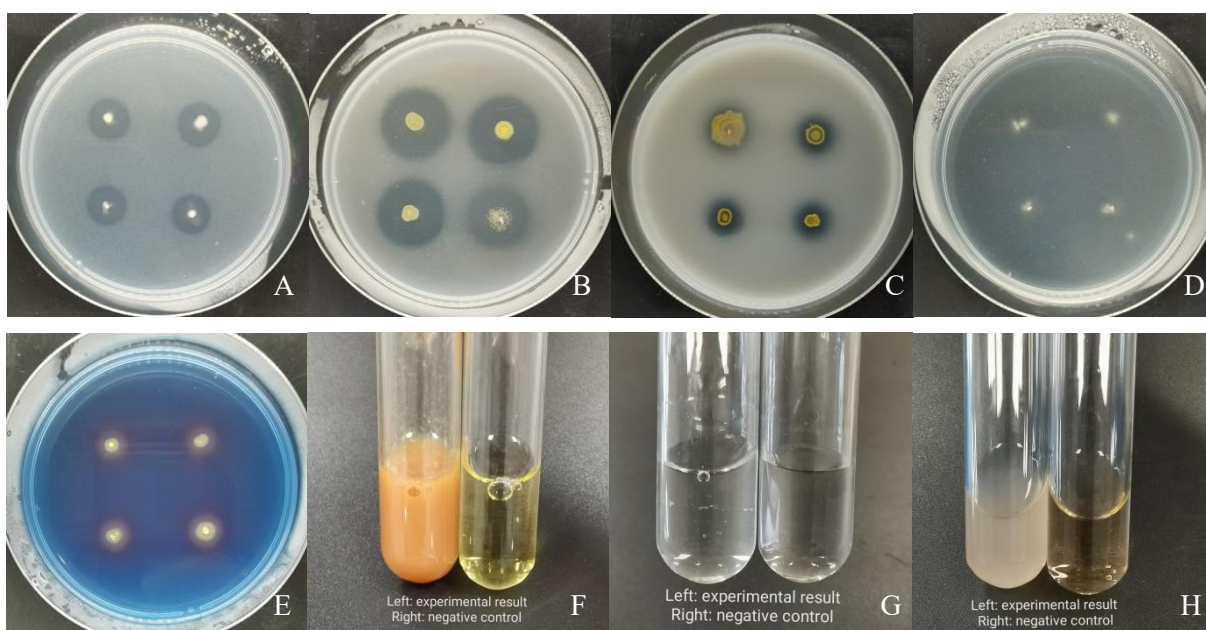

**Figure S2. plant growth promoting attributes**

(A: nitrogen fixation +, B: organic phosphate solubilization +, C: inorganic phosphate solubilization +, D: potassium dissolution –, E: siderophore production +, F:  $\text{NH}_3$  production +, G: ACC deaminase enzyme –, H: IAA production –)

**Table S1** Statistics of open reading frame (ORF) predictions

| Property                        | Value              |
|---------------------------------|--------------------|
| ORF num                         | 5809               |
| ORF total length                | 5641239 bp         |
| ORF density                     | 0.910 genes per kb |
| Longest ORF length              | 14976 bp           |
| ORF average length              | 971.12 bp          |
| Intergenic region length        | 741106 bp          |
| ORF/Genome(coding percentage)   | 88.39%             |
| Intergenic length/Genome        | 11.61%             |
| GC content in ORF region        | 67.24%             |
| GC content in intergenic region | 60.60%             |

**Table S2** Statistics of non-coding RNA predictions

| Type     | Copy Number | Avg. length (bp) | Total length (bp) | percent of genome (%) |
|----------|-------------|------------------|-------------------|-----------------------|
| 5S rRNA  | 4           | 110              | 440               | 0.0069                |
| 16S rRNA | 4           | 1531             | 6,124             | 0.0960                |
| 23S rRNA | 4           | 2888             | 11,552            | 0.1810                |
| tRNA     | 64          | 78               | 5,018             | 0.0786                |
| ncRNA    | 75          | 50               | 11,316            | 0.1773                |

**Table S3** CRISPRs prediction results

| CRISPRs type | Start     | End       | Number of Spacer | Length (bp) | Genome % |
|--------------|-----------|-----------|------------------|-------------|----------|
| Confirmed    | 1,509,057 | 1,509,624 | 9                | 567         | 0.0089   |
| Confirmed    | 2,870,988 | 2,872,271 | 21               | 1,283       | 0.0201   |
| Confirmed    | 2,881,146 | 2,882,434 | 21               | 1,288       | 0.0202   |
| Confirmed    | 331,258   | 331,371   | 1                | 113         | 0.0018   |
| Confirmed    | 1,667,569 | 1,667,719 | 1                | 150         | 0.0024   |
| Confirmed    | 2,420,690 | 2,420,783 | 1                | 93          | 0.0015   |
| Confirmed    | 5,906,018 | 5,906,118 | 1                | 100         | 0.0016   |
